# Supplementary material
Source: publisher figshare collection journal article supplement (https://springernature.figshare.com/ndownloader/files/25067579)
Supplement: Supplementary file 1 [file 25067579]

## Sheet: BHV_PCR_VBRV_Set
BatID	Species	Site	Day	Month	Year	Sex	Age	PCR_Sample_type	DrBHV_PCR	Sequence	VBRV_rtPCR	Sequence	RVNA	Predicted_titre
3876	Desmodus rotundus	LMA10	26	10	2015	M	A	Saliva	0	NA	0	NA	NA	NA
4513	Desmodus rotundus	LMA5	28	2	2018	M	A	Saliva	1	NA	0	NA	NA	NA
5359	Desmodus rotundus	LMA6	1	3	2018	M	A	Saliva	1	NA	0	NA	NA	NA
5359	Desmodus rotundus	LMA6	7	11	2016	M	A	NA	NA	NA	NA	NA	NA	NA
5410	Desmodus rotundus	API1	14	6	2016	F	A	Saliva	1	NA	0	NA	0	0.0611226
5611	Desmodus rotundus	HUA2	14	11	2015	F	A	Saliva	1	NA	0	NA	0	0.0180757
6024	Desmodus rotundus	CAJ4	9	12	2016	F	A	Saliva	1	NA	1	https://www.ncbi.nlm.nih.gov/nuccore/MT891038	NA	NA
6772	Desmodus rotundus	AYA1	12	7	2016	M	A	Saliva	1	NA	0	NA	0	0.126756
6772	Desmodus rotundus	AYA1	12	7	2016	M	A	Blood	1	NA	NA	NA	0	0.126756
6940	Desmodus rotundus	AYA1	12	7	2016	M	A	Saliva	1	NA	0	NA	0	0.0167857
6940	Desmodus rotundus	AYA1	12	7	2016	M	A	Blood	0	NA	NA	NA	0	0.0167857
7001	Desmodus rotundus	AYA1	12	7	2016	M	A	Saliva	0	NA	0	NA	0	0.123592
7081	Desmodus rotundus	AYA11	8	11	2017	M	A	Saliva	1	NA	0	NA	0	0.0244663
7100	Desmodus rotundus	API1	14	6	2016	M	A	Saliva	1	NA	0	NA	0	0.0590742
7181	Desmodus rotundus	AYA1	12	7	2016	M	A	NA	NA	NA	NA	NA	0	0.0115029
7181	Desmodus rotundus	AYA12	13	7	2015	M	J	Saliva	1	NA	0	NA	0	0.0654893
7502	Desmodus rotundus	CUS8	12	5	2016	F	A	Saliva	1	NA	0	NA	0	0.0576469
7502	Desmodus rotundus	CUS8	16	8	2015	F	A	NA	NA	NA	NA	NA	1	0.160256
7570	Desmodus rotundus	API140	18	8	2015	M	J	Saliva	1	NA	0	NA	0	0.0720668
7571	Desmodus rotundus	API140	18	5	2016	M	A	Saliva	1	NA	0	NA	0	0.0269221
7577	Desmodus rotundus	API140	18	8	2015	F	J	Saliva	1	NA	0	NA	0	0.0967499
7579	Desmodus rotundus	API140	18	8	2015	F	J	Saliva	1	NA	0	NA	0	0.0117819
7582	Desmodus rotundus	API140	18	8	2015	M	J	Saliva	1	NA	0	NA	0	0.0524739
7588	Desmodus rotundus	API18	19	8	2015	F	J	Saliva	1	NA	0	NA	1	0.17868
7831	Desmodus rotundus	AYA4	18	7	2015	M	J	Saliva	1	NA	0	NA	1	0.180762
7878	Desmodus rotundus	AYA1	12	7	2016	F	SA	Blood	0	NA	NA	NA	NA	NA
7878	Desmodus rotundus	AYA15	27	7	2015	F	SA	Saliva	1	NA	0	NA	NA	NA
7917	Desmodus rotundus	CUS6	7	8	2015	M	J	Saliva	1	NA	0	NA	0	0.0407036
7957	Desmodus rotundus	API17	11	8	2015	M	J	Saliva	1	NA	0	NA	0	0.0511838
7957	Desmodus rotundus	AYA1	12	7	2016	M	J	Blood	0	NA	NA	NA	NA	NA
7962	Desmodus rotundus	API17	11	8	2015	M	J	Saliva	1	NA	0	NA	0	0.0984151
7966	Desmodus rotundus	API17	11	8	2015	M	J	Saliva	1	NA	0	NA	0	0.124044
7969	Desmodus rotundus	API17	11	8	2015	F	J	Saliva	0	NA	0	NA	0	0.0305743
7999	Desmodus rotundus	CUS8	12	8	2015	M	J	Saliva	0	NA	0	NA	0	0.0637766
8009	Desmodus rotundus	HUA1	21	10	2016	F	J	Saliva	1	NA	0	NA	0	0.0149451
8010	Desmodus rotundus	HUA1	21	10	2016	M	J	Saliva	1	NA	0	NA	0	0.0314657
8011	Desmodus rotundus	HUA1	21	10	2016	M	J	Saliva	1	NA	0	NA	0	0.0234828
8014	Desmodus rotundus	HUA1	21	10	2016	F	J	Saliva	1	NA	0	NA	0	0.0256379
8017	Desmodus rotundus	HUA1	21	10	2016	M	J	Saliva	1	NA	0	NA	0	0.0052523
8026	Desmodus rotundus	HUA4	22	10	2016	F	SA	Saliva	1	NA	0	NA	0	0.0242289
8028	Desmodus rotundus	HUA4	22	10	2016	F	SA	Saliva	1	NA	0	NA	0	0.0960351
8029	Desmodus rotundus	HUA4	22	10	2016	F	J	Saliva	1	NA	0	NA	0	0.0122222
8035	Desmodus rotundus	HUA4	22	10	2016	F	A	Saliva	1	NA	0	NA	0	0.0129845
8036	Desmodus rotundus	HUA4	22	10	2016	F	SA	Saliva	1	https://www.ncbi.nlm.nih.gov/nuccore/MT912489	0	NA	0	0.0123866
8038	Desmodus rotundus	HUA4	22	10	2016	F	A	Saliva	1	https://www.ncbi.nlm.nih.gov/nuccore/MT912480	0	NA	0	0.0183243
8049	Desmodus rotundus	AYA1	12	7	2016	M	J	Blood	0	NA	NA	NA	0	0.0128891
8049	Desmodus rotundus	LMA6	6	11	2016	M	J	Saliva	1	NA	0	NA	0	0.0128891
8064	Desmodus rotundus	LMA6	7	11	2016	F	A	Blood	1	NA	NA	NA	0	0.051221
8064	Desmodus rotundus	LMA6	1	5	2017	F	A	NA	NA	NA	NA	NA	0	0.0483373
8065	Desmodus rotundus	LMA6	7	11	2016	M	A	Blood	1	NA	NA	NA	0	0.0264814
8074	Desmodus rotundus	LMA6	8	11	2016	F	A	Blood	0	NA	NA	NA	NA	NA
8075	Desmodus rotundus	LMA6	8	11	2016	M	A	Blood	0	NA	NA	NA	0	0.0263845
8086	Desmodus rotundus	CAJ1	30	11	2016	F	A	Blood	0	NA	NA	NA	0	0.0356398
8086	Desmodus rotundus	CAJ1	22	7	2017	F	A	NA	NA	NA	NA	NA	0	0.0607704
8086	Desmodus rotundus	CAJ1	1	12	2016	F	A	NA	NA	NA	NA	NA	NA	NA
8087	Desmodus rotundus	CAJ1	30	11	2016	M	A	Blood	1	NA	NA	NA	0	0.0691144
8087	Desmodus rotundus	CAJ1	1	12	2016	M	A	NA	NA	NA	NA	NA	NA	NA
8088	Desmodus rotundus	CAJ1	30	11	2016	M	A	Blood	0	NA	NA	NA	1	0.167969
8088	Desmodus rotundus	CAJ1	21	7	2017	M	A	NA	NA	NA	NA	NA	1	0.194802
8088	Desmodus rotundus	CAJ1	18	8	2018	M	A	NA	NA	NA	NA	NA	NA	NA
8089	Desmodus rotundus	CAJ1	30	11	2016	M	A	Blood	0	NA	NA	NA	0	0.068503
8090	Desmodus rotundus	CAJ1	30	11	2016	M	A	Blood	0	NA	NA	NA	1	0.166951
8090	Desmodus rotundus	CAJ1	21	7	2017	M	A	NA	NA	NA	NA	NA	1	0.18802
8090	Desmodus rotundus	CAJ1	1	12	2016	M	A	NA	NA	NA	NA	NA	NA	NA
8090	Desmodus rotundus	CAJ1	18	8	2018	M	A	NA	NA	NA	NA	NA	NA	NA
8091	Desmodus rotundus	CAJ1	21	7	2017	F	A	NA	NA	NA	NA	NA	0	0.0927682
8091	Desmodus rotundus	CAJ1	1	12	2016	F	A	Blood	1	NA	NA	NA	NA	NA
8091	Desmodus rotundus	CAJ1	18	8	2018	F	A	NA	NA	NA	NA	NA	NA	NA
8093	Desmodus rotundus	CAJ1	1	12	2016	M	A	Blood	1	NA	NA	NA	0	0.0145625
8207	Desmodus rotundus	AYA11	7	7	2016	F	A	Saliva	1	NA	0	NA	0	0.0454559
8208	Desmodus rotundus	AYA11	7	7	2016	M	SA	Saliva	1	NA	0	NA	0	0.0333763
8209	Desmodus rotundus	AYA11	7	7	2016	F	A	Saliva	1	https://www.ncbi.nlm.nih.gov/nuccore/MT432305	0	NA	0	0.0327759
8210	Desmodus rotundus	AYA11	7	7	2016	M	A	Saliva	1	NA	0	NA	0	0.0371915
8211	Desmodus rotundus	AYA11	7	7	2016	F	A	Saliva	1	https://www.ncbi.nlm.nih.gov/nuccore/MT912481	0	NA	0	0.0838221
8230	Desmodus rotundus	AYA1	12	7	2016	F	A	Blood	1	NA	NA	NA	0	0.0151765
8231	Desmodus rotundus	AYA1	12	7	2016	M	A	Blood	0	NA	NA	NA	0	0.0100698
8232	Desmodus rotundus	AYA1	12	7	2016	M	A	Blood	1	NA	NA	NA	0	0.00773362
8237	Desmodus rotundus	AYA1	12	7	2016	M	A	Saliva	1	NA	0	NA	0	0.0150578
8237	Desmodus rotundus	AYA1	12	7	2016	M	A	Blood	1	NA	NA	NA	NA	NA
8238	Desmodus rotundus	AYA1	12	7	2016	M	A	Saliva	1	NA	0	NA	1	0.164497
8238	Desmodus rotundus	AYA1	12	7	2016	M	A	Blood	1	NA	NA	NA	NA	NA
8239	Desmodus rotundus	AYA1	12	7	2016	M	A	Saliva	1	NA	0	NA	0	0.0196047
8239	Desmodus rotundus	AYA1	12	7	2016	M	A	Blood	1	NA	NA	NA	NA	NA
8240	Desmodus rotundus	AYA1	12	7	2016	F	A	Saliva	1	NA	0	NA	0	0.0153268
8240	Desmodus rotundus	AYA1	12	7	2016	F	A	Blood	0	NA	NA	NA	NA	NA
8241	Desmodus rotundus	AYA1	30	10	2017	F	A	Saliva	1	NA	0	NA	1	0.207639
8241	Desmodus rotundus	AYA1	12	7	2016	F	A	Blood	1	NA	NA	NA	0	0.155876
8242	Desmodus rotundus	AYA1	12	7	2016	M	A	Saliva	1	NA	0	NA	0	0.0227188
8242	Desmodus rotundus	AYA1	12	7	2016	M	A	Blood	1	NA	0	NA	0	0.0227188
8297	Desmodus rotundus	AYA14	19	7	2016	F	SA	Saliva	1	NA	0	NA	0	0.0243531
8299	Desmodus rotundus	AYA14	19	7	2016	F	A	Blood	1	NA	NA	NA	0	0.00991238
8301	Desmodus rotundus	AYA14	19	7	2016	M	A	Blood	0	NA	NA	NA	0	0.0143506
8302	Desmodus rotundus	AYA14	19	7	2016	M	SA	Blood	1	NA	NA	NA	0	0.0319446
8303	Desmodus rotundus	AYA14	19	7	2016	F	A	Blood	0	NA	NA	NA	0	0.00691533
8304	Desmodus rotundus	AYA14	19	7	2016	F	A	Blood	0	NA	NA	NA	0	0.0103337
8305	Desmodus rotundus	AYA14	19	7	2016	M	SA	Blood	0	NA	NA	NA	0	0.021546
8306	Desmodus rotundus	AYA14	19	7	2016	F	A	Blood	0	NA	NA	NA	0	0.00949236
8307	Desmodus rotundus	AYA14	19	7	2016	F	SA	Blood	0	NA	NA	NA	0	0.0109242
8328	Desmodus rotundus	API17	21	7	2016	F	J	Saliva	1	NA	0	NA	0	0.0127473
8336	Desmodus rotundus	HUA2	17	10	2016	F	J	Saliva	1	NA	0	NA	1	0.178831
8342	Desmodus rotundus	HUA2	17	10	2016	F	J	Saliva	1	NA	0	NA	0	0.0664558
8346	Desmodus rotundus	HUA2	17	10	2016	M	J	Saliva	1	NA	0	NA	0	0.109117
8381	Desmodus rotundus	CAJ4	9	12	2016	M	A	Saliva	1	https://www.ncbi.nlm.nih.gov/nuccore/MT432306	0	NA	0	0.0670818
8382	Desmodus rotundus	CAJ4	9	12	2016	F	A	Saliva	1	NA	0	NA	0	0.00283627
8383	Desmodus rotundus	CAJ4	9	12	2016	M	A	Saliva	1	https://www.ncbi.nlm.nih.gov/nuccore/MT912482	0	NA	0	0.0107008
8384	Desmodus rotundus	CAJ4	9	12	2016	F	A	Saliva	1	NA	0	NA	0	0.0361824
8404	Desmodus rotundus	AMA2	13	12	2016	M	A	Saliva	1	NA	0	NA	NA	NA
8406	Desmodus rotundus	AMA2	13	12	2016	F	A	Saliva	1	NA	0	NA	NA	NA
8407	Desmodus rotundus	AMA2	13	12	2016	M	A	Saliva	1	NA	0	NA	NA	NA
8408	Desmodus rotundus	AMA2	13	12	2016	M	SA	Saliva	1	https://www.ncbi.nlm.nih.gov/nuccore/MT912483	0	NA	NA	NA
8409	Desmodus rotundus	AMA2	13	12	2016	M	A	Saliva	1	https://www.ncbi.nlm.nih.gov/nuccore/MT432308	0	NA	NA	NA
8431	Desmodus rotundus	LMA12	31	1	2017	F	J	Saliva	1	NA	0	NA	NA	NA
8514	Desmodus rotundus	LMA4	29	3	2017	F	SA	Saliva	1	NA	0	NA	NA	NA
8515	Desmodus rotundus	LMA4	29	3	2017	F	SA	Saliva	1	NA	0	NA	NA	NA
8523	Desmodus rotundus	LMA4	29	3	2017	M	SA	Saliva	1	NA	0	NA	NA	NA
9085	Desmodus rotundus	LMA6	28	4	2016	F	A	Blood	0	NA	NA	NA	NA	NA
9105	Desmodus rotundus	LMA5	28	2	2018	F	A	Saliva	1	NA	0	NA	NA	NA
9105	Desmodus rotundus	LMA5	30	4	2016	F	A	NA	NA	NA	NA	NA	1	0.362434
9132	Desmodus rotundus	API141	12	5	2016	M	J	Saliva	1	NA	0	NA	0	0.0341608
9133	Desmodus rotundus	API141	12	5	2016	F	SA	Saliva	1	NA	0	NA	0	0.0227502
9217	Desmodus rotundus	CUS8	13	6	2018	M	A	Saliva	1	NA	0	NA	NA	NA
9217	Desmodus rotundus	CUS8	16	5	2016	M	A	NA	NA	NA	NA	NA	0	0.0295961
9217	Desmodus rotundus	CUS8	20	6	2017	M	A	NA	NA	NA	NA	NA	0	0.0276544
9219	Desmodus rotundus	CUS8	13	6	2018	F	A	Saliva	1	NA	0	NA	NA	NA
9219	Desmodus rotundus	CUS8	16	5	2016	F	A	NA	NA	NA	NA	NA	1	0.16861
9232	Desmodus rotundus	CUS8	16	5	2016	F	A	Saliva	1	https://www.ncbi.nlm.nih.gov/nuccore/MT912484	0	NA	0	0.0234216
9233	Desmodus rotundus	CUS8	16	5	2016	F	A	Saliva	1	NA	0	NA	0	0.0431883
9234	Desmodus rotundus	CUS8	16	5	2016	F	A	Saliva	1	NA	0	NA	0	0.0311447
9235	Desmodus rotundus	CUS8	16	5	2016	F	A	Saliva	1	https://www.ncbi.nlm.nih.gov/nuccore/MT912485	0	NA	0	0.021759
9244	Desmodus rotundus	API140	18	5	2016	M	SA	Saliva	1	NA	0	NA	0	0.0500031
9255	Desmodus rotundus	API140	18	5	2016	F	A	Saliva	1	NA	0	NA	0	0.0785542
9256	Desmodus rotundus	API140	18	5	2016	M	A	Saliva	1	https://www.ncbi.nlm.nih.gov/nuccore/MT912486	0	NA	0	0.0275212
9257	Desmodus rotundus	API140	18	5	2016	M	A	Saliva	1	NA	0	NA	0	0.0435686
9258	Desmodus rotundus	API140	18	5	2016	F	J	Saliva	1	https://www.ncbi.nlm.nih.gov/nuccore/MT912490	0	NA	0	0.0442613
9281	Desmodus rotundus	API1	14	6	2016	F	A	Saliva	1	NA	0	NA	0	0.0759169
9281	Desmodus rotundus	API1	4	6	2017	F	A	NA	NA	NA	NA	NA	0	0.112651
9282	Desmodus rotundus	API1	14	6	2016	M	A	Saliva	1	https://www.ncbi.nlm.nih.gov/nuccore/MT912487	0	NA	0	0.101256
9283	Desmodus rotundus	API1	14	6	2016	F	A	Saliva	1	https://www.ncbi.nlm.nih.gov/nuccore/MT912488	0	NA	0	0.0575719
9284	Desmodus rotundus	AYA15	16	6	2016	F	J	Saliva	1	NA	0	NA	0	0.0371509
9453	Desmodus rotundus	AYA15	7	6	2017	M	J	Saliva	1	NA	0	NA	0	0.00788581
9455	Desmodus rotundus	AYA15	7	6	2017	M	J	Saliva	1	NA	0	NA	NA	NA
9456	Desmodus rotundus	AYA15	7	6	2017	F	J	Saliva	1	NA	0	NA	NA	NA
9547	Desmodus rotundus	CUS8	13	6	2018	M	A	Saliva	1	NA	0	NA	NA	NA
9547	Desmodus rotundus	CUS8	20	6	2017	M	A	NA	NA	NA	NA	NA	0	0.0267704
9556	Desmodus rotundus	CUS8	13	6	2018	M	A	Saliva	1	NA	0	NA	NA	NA
9556	Desmodus rotundus	CUS8	20	6	2017	M	A	NA	NA	NA	NA	NA	0	0.0880879
9558	Desmodus rotundus	CUS8	13	6	2018	M	A	Saliva	1	NA	0	NA	NA	NA
9558	Desmodus rotundus	CUS8	21	6	2017	M	A	NA	NA	NA	NA	NA	0	0.14077
9561	Desmodus rotundus	CUS8	13	6	2018	F	A	Saliva	1	NA	0	NA	NA	NA
9561	Desmodus rotundus	CUS8	21	6	2017	F	A	NA	NA	NA	NA	NA	0	0.0381419
9569	Desmodus rotundus	CUS8	13	6	2018	M	A	Saliva	1	NA	0	NA	NA	NA
9569	Desmodus rotundus	CUS8	21	6	2017	M	A	NA	NA	NA	NA	NA	0	0.105869
9836	Desmodus rotundus	AYA15	5	11	2017	M	J	Saliva	1	NA	0	NA	0	0.0542939
10059	Desmodus rotundus	LMA6	1	3	2018	M	J	Saliva	1	NA	0	NA	NA	NA
10073	Desmodus rotundus	AYA15	8	11	2018	M	SA	NA	NA	NA	NA	NA	NA	NA
10073	Desmodus rotundus	AYA15	16	5	2018	M	J	Saliva	1	NA	0	NA	NA	NA
10092	Desmodus rotundus	AYA15	16	5	2018	M	J	Saliva	1	NA	0	NA	NA	NA
10141	Desmodus rotundus	CUS8	13	6	2018	M	A	Saliva	1	NA	0	NA	NA	NA
10142	Desmodus rotundus	CUS8	13	6	2018	M	A	Saliva	1	NA	0	NA	NA	NA
10143	Desmodus rotundus	CUS8	13	6	2018	F	A	Saliva	1	NA	0	NA	NA	NA
10144	Desmodus rotundus	CUS8	13	6	2018	M	A	Saliva	1	NA	0	NA	NA	NA
10145	Desmodus rotundus	CUS8	13	6	2018	M	SA	Saliva	1	NA	0	NA	NA	NA
10146	Desmodus rotundus	CUS8	13	6	2018	M	A	Saliva	1	NA	0	NA	NA	NA
10147	Desmodus rotundus	CUS8	13	6	2018	M	A	Saliva	1	NA	0	NA	NA	NA
10148	Desmodus rotundus	CUS8	13	6	2018	F	SA	Saliva	1	NA	0	NA	NA	NA
10149	Desmodus rotundus	CUS8	13	6	2018	F	A	Saliva	1	NA	0	NA	NA	NA
10150	Desmodus rotundus	CUS8	13	6	2018	M	SA	Saliva	1	NA	0	NA	NA	NA
10151	Desmodus rotundus	CUS8	13	6	2018	M	A	Saliva	1	NA	0	NA	NA	NA
10152	Desmodus rotundus	CUS8	13	6	2018	M	A	Saliva	1	NA	0	NA	NA	NA
10153	Desmodus rotundus	CUS8	13	6	2018	M	A	Saliva	1	NA	0	NA	NA	NA
10154	Desmodus rotundus	CUS8	13	6	2018	F	A	Saliva	1	NA	0	NA	NA	NA
10155	Desmodus rotundus	CUS8	13	6	2018	M	A	Saliva	1	NA	0	NA	NA	NA
10156	Desmodus rotundus	CUS8	13	6	2018	M	A	Saliva	1	NA	0	NA	NA	NA
10242	Desmodus rotundus	HUA4	7	8	2018	M	J	Saliva	1	NA	0	NA	NA	NA
10244	Desmodus rotundus	HUA4	7	8	2018	F	J	Saliva	1	NA	0	NA	NA	NA
10245	Desmodus rotundus	HUA4	7	8	2018	M	J	Saliva	1	NA	0	NA	NA	NA
10258	Desmodus rotundus	HUA4	7	8	2018	F	J	Saliva	1	NA	0	NA	NA	NA
6252-1	Diphylla	AMA2	13	12	2016			Saliva	1	https://www.ncbi.nlm.nih.gov/nuccore/MT432307	NA	NA	NA	NA
6252-2	Diphylla	AMA2	13	12	2016			Saliva	0	NA	NA	NA	NA	NA
AF-1	Artibeus fraterculus	LMA6	6	11	2016			Saliva	0	NA	NA	NA	NA	NA
AF-2	Artibeus fraterculus	LMA6	6	11	2016			Saliva	0	NA	NA	NA	NA	NA
AF-3	Artibeus fraterculus	LMA6	6	11	2016			Saliva	0	NA	NA	NA	NA	NA
AF-4	Artibeus fraterculus	LMA6	6	11	2016			Saliva	0	NA	NA	NA	NA	NA
AF-5	Artibeus fraterculus	LMA6	6	11	2016			Saliva	0	NA	NA	NA	NA	NA
AG-1	Anoura geoffroyi	CAJ1	30	11	2016			Saliva	0	NA	NA	NA	NA	NA
AG-2	Anoura geoffroyi	CAJ1	1	12	2016			Saliva	0	NA	NA	NA	NA	NA
AG-4	Anoura geoffroyi	CAJ2	4	12	2016			Saliva	0	NA	NA	NA	NA	NA
AG-4	Anoura geoffroyi	CAJ2	4	12	2016			Fecal	0	NA	NA	NA	NA	NA
AG-5	Anoura geoffroyi	CAJ3	5	12	2016			Saliva	0	NA	NA	NA	NA	NA
AG-5	Anoura geoffroyi	CAJ3	5	12	2016			Fecal	0	NA	NA	NA	NA	NA
AG-6	Anoura geoffroyi	CAJ3	5	12	2016			Saliva	0	NA	NA	NA	NA	NA
AG-6	Anoura geoffroyi	CAJ3	5	12	2016			Fecal	0	NA	NA	NA	NA	NA
AP-1	Artibeus planirostris	API1	14	6	2016			Saliva	0	NA	NA	NA	NA	NA
AP-2	Artibeus planirostris	AYA12	11	7	2016			Saliva	0	NA	NA	NA	NA	NA
Arti li 2	Artibeus lituratus	LR4	31	8	2016			Saliva	1	https://www.ncbi.nlm.nih.gov/nuccore/MT432309	NA	NA	NA	NA
Arti litu 1	Artibeus lituratus	LR4	31	8	2016			Saliva	0	NA	NA	NA	NA	NA
Arti obs 1	Artibeus obscurus	LR4	31	8	2016			Saliva	0	NA	NA	NA	NA	NA
Arti obs 3	Artibeus obscurus	LR4	31	8	2016			Saliva	0	NA	NA	NA	NA	NA
Arti plani 1	Artibeus planirostris	LR4	31	8	2016			Saliva	0	NA	NA	NA	NA	NA
Artibeus obscurus	Artibeus obscurus	AMA2	31	8	2016			Saliva	0	NA	NA	NA	NA	NA
Artibeus obscurus	Artibeus obscurus	AMA2	31	8	2016			Saliva	0	NA	NA	NA	NA	NA
AY1	Chiroderma trinitatum	LR1	7	9	2016			Saliva	0	NA	NA	NA	NA	NA
AY10	Carollia perspicillata	LR1	7	9	2016			Saliva	0	NA	NA	NA	NA	NA
AY11	Myotis oxyotus	LR1	7	9	2016			Saliva	0	NA	NA	NA	NA	NA
AY2	Carollia perspicillata	LR1	7	9	2016			Saliva	0	NA	NA	NA	NA	NA
AY3	Carollia perspicillata	LR1	7	9	2016			Saliva	0	NA	NA	NA	NA	NA
AY4	Carollia perspicillata	LR1	7	9	2016			Saliva	0	NA	NA	NA	NA	NA
AY5	Carollia perspicillata	LR1	7	9	2016			Saliva	0	NA	NA	NA	NA	NA
AY6	Carollia perspicillata	LR1	7	9	2016			Saliva	0	NA	NA	NA	NA	NA
AY7	Carollia perspicillata	LR1	7	9	2016			Saliva	0	NA	NA	NA	NA	NA
AY8	Glossophaga soricina	LR1	7	9	2016			Saliva	1	https://www.ncbi.nlm.nih.gov/nuccore/MT432310	NA	NA	NA	NA
AY9	Carollia perspicillata	LR1	7	9	2016			Saliva	0	NA	NA	NA	NA	NA
B1	Choeroniscus minor	LR2	11	9	2016			Saliva	0	NA	NA	NA	NA	NA
B2	Chiroderma salvini	LR2	11	9	2016			Fecal	0	NA	NA	NA	NA	NA
B2	Chiroderma salvini	LR2	11	9	2016			Saliva	0	NA	NA	NA	NA	NA
B3	Glossophaga soricina	LR2	11	9	2016			Saliva	1	https://www.ncbi.nlm.nih.gov/nuccore/MT432311	NA	NA	NA	NA
Carollia	Carollia perspicillata	AMA2	31	8	2016			Saliva	0	NA	NA	NA	NA	NA
Carollia	Carollia perspicillata	AMA2	31	8	2016			Saliva	0	NA	NA	NA	NA	NA
Carollia	Carollia perspicillata	AMA2	31	8	2016			Saliva	0	NA	NA	NA	NA	NA
Carollia	Carollia perspicillata	AMA2	31	8	2016			Saliva	0	NA	NA	NA	NA	NA
Carollia	Carollia perspicillata	AMA2	31	8	2016			Saliva	0	NA	NA	NA	NA	NA
Carollia	Carollia perspicillata	AMA2	31	8	2016			Saliva	0	NA	NA	NA	NA	NA
Carollia	Carollia perspicillata	AMA2	31	8	2016			Saliva	0	NA	NA	NA	NA	NA
Carollia 5	Carollia perspicillata	AMA2	31	8	2016			Saliva	0	NA	NA	NA	NA	NA
Carollia 5	Carollia perspicillata	AMA2	31	8	2016			Fecal	0	NA	NA	NA	NA	NA
Carollia 6	Carollia perspicillata	AMA2	31	8	2016			Saliva	0	NA	NA	NA	NA	NA
Carollia 6	Carollia perspicillata	AMA2	31	8	2016			Fecal	0	NA	NA	NA	NA	NA
Carollia 6	Carollia perspicillata	AMA2	31	8	2016			Fecal	0	NA	NA	NA	NA	NA
Carollia 7	Carollia perspicillata	AMA2	31	8	2016			Saliva	0	NA	NA	NA	NA	NA
Carollia 7	Carollia perspicillata	AMA2	31	8	2016			Fecal	0	NA	NA	NA	NA	NA
Carollia 8	Carollia perspicillata	AMA2	31	8	2016			Saliva	0	NA	NA	NA	NA	NA
Carollia 8	Carollia perspicillata	AMA2	31	8	2016			Fecal	0	NA	NA	NA	NA	NA
Carollia 9	Carollia perspicillata	AMA2	31	8	2016			Saliva	0	NA	NA	NA	NA	NA
Carollia p 1	Carollia perspicillata	LR4	31	8	2016			Saliva	0	NA	NA	NA	NA	NA
Carollia p 10	Carollia perspicillata	AMA2	31	8	2016			Saliva	0	NA	NA	NA	NA	NA
Carollia p 10	Carollia perspicillata	AMA2	31	8	2016			Fecal	0	NA	NA	NA	NA	NA
Carollia p 2	Carollia perspicillata	LR4	31	8	2016			Saliva	0	NA	NA	NA	NA	NA
Carollia p 3	Carollia perspicillata	LR4	31	8	2016			Saliva	0	NA	NA	NA	NA	NA
Carollia p 4	Carollia perspicillata	LR4	31	8	2016			Saliva	0	NA	NA	NA	NA	NA
Carollia p 5	Carollia perspicillata	LR4	31	8	2016			Saliva	0	NA	NA	NA	NA	NA
Carollia p 6	Carollia perspicillata	LR4	31	8	2016			Saliva	0	NA	NA	NA	NA	NA
Carollia p 7	Carollia perspicillata	LR4	31	8	2016			Saliva	0	NA	NA	NA	NA	NA
Carollia p 9	Carollia perspicillata	AMA2	31	8	2016			Saliva	0	NA	NA	NA	NA	NA
CH1	Carollia perspicillata	LR3	2	9	2016			Saliva	0	NA	NA	NA	NA	NA
CH2	Carollia perspicillata	LR3	2	9	2016			Saliva	0	NA	NA	NA	NA	NA
CH3	Myotis oxyotus	LR3	2	9	2016			Saliva	1	https://www.ncbi.nlm.nih.gov/nuccore/MT432312	NA	NA	NA	NA
CH4	Artibeus lituratus	LR3	2	9	2016			Saliva	0	NA	NA	NA	NA	NA
CH5	Vampyressa bidens	LR3	3	9	2016			Saliva	0	NA	NA	NA	NA	NA
CP-1	Carollia perspicillata	CAJ4	8	12	2016			Saliva	0	NA	NA	NA	NA	NA
CP-2	Carollia perspicillata	AMA2	13	12	2016			Saliva	0	NA	NA	NA	NA	NA
CP-3	Carollia perspicillata	AMA2	13	12	2016			Saliva	0	NA	NA	NA	NA	NA
CP-4	Carollia perspicillata	AMA2	13	12	2016			Saliva	0	NA	NA	NA	NA	NA
CP-5	Carollia perspicillata	AMA2	13	12	2016			Saliva	0	NA	NA	NA	NA	NA
CP-6	Carollia perspicillata	AMA2	13	12	2016			Saliva	0	NA	NA	NA	NA	NA
D216	Desmodus rotundus	LR3	8	5	2016	M	A	Saliva	1	NA	0	NA	NA	NA
D242	Desmodus rotundus	LR3	2	9	2016	M	A	Saliva	1	NA	0	NA	NA	NA
D243	Desmodus rotundus	LR3	2	9	2016	M	A	Saliva	1	NA	0	NA	NA	NA
D244	Desmodus rotundus	LR3	2	9	2016	M	A	Saliva	1	NA	0	NA	NA	NA
D245	Desmodus rotundus	LR3	2	9	2016	M	A	Saliva	1	NA	0	NA	NA	NA
D246	Desmodus rotundus	LR3	2	9	2016	M	A	Saliva	1	NA	0	NA	NA	NA
D247	Desmodus rotundus	LR3	2	9	2016	F	A	Saliva	1	NA	0	NA	NA	NA
D248	Desmodus rotundus	LR3	2	9	2016	M	A	Saliva	1	NA	0	NA	NA	NA
D249	Desmodus rotundus	LR3	2	9	2016	F	A	Saliva	1	NA	0	NA	NA	NA
D250	Desmodus rotundus	LR3	2	9	2016	F	A	Saliva	1	NA	0	NA	NA	NA
Glossophaga 2	Glossophaga soricina	LR4	31	8	2016			Saliva	1	https://www.ncbi.nlm.nih.gov/nuccore/MT912491	NA	NA	NA	NA
Glossophaga s	Glossophaga soricina	LR4	31	8	2016			Saliva	1	https://www.ncbi.nlm.nih.gov/nuccore/MT912492	NA	NA	NA	NA
GS-1	Glossophaga soricina	AMA2	13	12	2016			Saliva	0	NA	NA	NA	NA	NA
L. aurita	Lonchorhina aurita	AMA2	13	12	2016			Saliva	0	NA	NA	NA	NA	NA
L. aurita	Lonchorhina aurita	AMA2	13	12	2016			Saliva	0	NA	NA	NA	NA	NA
LA-1	Lonchorhina aurita	AMA2	13	12	2016			Saliva	0	NA	NA	NA	NA	NA
LA-2	Lonchorhina aurita	AMA2	13	12	2016			Saliva	0	NA	NA	NA	NA	NA
LA-3	Lonchorhina aurita	AMA2	13	12	2016			Saliva	0	NA	NA	NA	NA	NA
LA-4	Lonchorhina aurita	AMA2	13	12	2016			Saliva	0	NA	NA	NA	NA	NA
LA-5	Lonchorhina aurita	AMA2	13	12	2016			Saliva	0	NA	NA	NA	NA	NA
MO-1	Myotis oxyotus	CAJ1	30	11	2016			Saliva	1	https://www.ncbi.nlm.nih.gov/nuccore/MT432313	NA	NA	NA	NA
MO-1	Myotis oxyotus	CAJ1	30	11	2016			Fecal	0	NA	NA	NA	NA	NA
MO-2	Myotis oxyotus	CAJ3	5	12	2016			Saliva	0	NA	NA	NA	NA	NA
MO-2	Myotis oxyotus	CAJ3	5	12	2016			Fecal	0	NA	NA	NA	NA	NA
MO-3	Myotis oxyotus	CAJ3	6	12	2016			Saliva	1	https://www.ncbi.nlm.nih.gov/nuccore/MT912493	NA	NA	NA	NA
MO-3	Myotis oxyotus	CAJ3	6	12	2016			Fecal	0	NA	NA	NA	NA	NA
MO-4	Myotis oxyotus	AMA5	16	12	2016			Fecal	0	NA	NA	NA	NA	NA
MO-5	Myotis oxyotus	AMA5	16	12	2016			Saliva	0	NA	NA	NA	NA	NA
MO-6	Myotis oxyotus	AMA5	16	12	2016			Fecal	0	NA	NA	NA	NA	NA
PD-1	Phyllostomus discolor	CAJ4	8	12	2016			Saliva	0	NA	NA	NA	NA	NA
R. naso 1	Rhynchonycteris naso	LR4	31	8	2016			Saliva	1	https://www.ncbi.nlm.nih.gov/nuccore/MT432316	NA	NA	NA	NA
R. pumilio	Rhinophylla pumilio	CAJ4	8	12	2016			Saliva	0	NA	NA	NA	NA	NA
R. pumilio	Rhinophylla pumilio	CAJ4	8	12	2016			Saliva	0	NA	NA	NA	NA	NA
Sacopteryx 1	Saccopteryx bilineata	LR4	31	8	2016			Saliva	1	https://www.ncbi.nlm.nih.gov/nuccore/MT432314	NA	NA	NA	NA
SE-1	Sturnira	AMA5	16	12	2016			Saliva	1	NA	NA	NA	NA	NA
SE-2	Sturnira	AMA5	16	12	2016			Saliva	0	NA	NA	NA	NA	NA
SE-3	Sturnira	AMA5	16	12	2016			Saliva	0	NA	NA	NA	NA	NA
SE-4	Sturnira	AMA5	16	12	2016			Saliva	0	NA	NA	NA	NA	NA
SE-5	Sturnira	AMA5	16	12	2016			Saliva	0	NA	NA	NA	NA	NA
Sturnira 1	Sturnira	LR4	31	8	2016			Saliva	1	https://www.ncbi.nlm.nih.gov/nuccore/MT432315	NA	NA	NA	NA
Vampyressa 1	Vampyressa bidens	LR4	31	8	2016			Saliva	0	NA	NA	NA	NA	NA
Vampyressa 2	Vampyressa bidens	LR4	31	8	2016			Saliva	0	NA	NA	NA	NA	NA
Vampyressa bidens 1	Vampyressa bidens	LR4	31	8	2016			Saliva	0	NA	NA	NA	NA	NA

## Sheet: Metadata
Variable	Description or uits
BatID	Bat identification; wing tag
Species	Species of bat sampled
Site	Site identification code
Day	Day of sampling
Month	Month of sampling
Year	Year of sampling
Sex	(M)ale or (F)emale
Age	(A)dult, (S)ubadult or (J)uvenile
PCR_Sample_type	The sample type used for the BHV and VBRV PCR. NA if not tested by PCR.
DrBHV_PCR	1=PCR positive, 0=PCR negative
Sequence	Link to the GenBank sequence record if the PCR product was sequenced.
VBRV_rtPCR	1=PCR positive, 0=PCR negative
Sequence	Link to the GenBank sequence record if the PCR product was sequenced.
RVNA	Rabies virus neutralising antibody, cutoff 0.16 IU 1=positive, 0=negative.
Predicted_titre	Predicted titre of rabies virus neutralising antibodies (international units, UI)
Blank=this information was not collected/recorded.
NA=sample did not undergo this test.
